# Supplementary material for: Real-Time Exposure to 3D-Printing Emissions Elicits Metabolic and Pro-Inflammatory Responses in Human Airway Epithelial Cells
Source: MDPI journal article supplement (doi:10.3390/toxics12010067), 2024-01-13
Supplement: s1 [file s1]

**Supplemental Material**

**Real-Time Exposure to 3D-Printing Emissions Elicits Metabolic and Pro-Inflammatory  
Responses in Human Airway  
Epithelial Cells**

Barnett, L,<sup>1†</sup> He, X.,<sup>1†</sup> Jeon, J.,<sup>1</sup> Zhang, Q.,<sup>1</sup> Alqahtani, S.,<sup>2,3</sup> Black, M.,<sup>1</sup> Shannahan, J.,<sup>2</sup> Wright,  
C.<sup>1\*</sup>

<sup>1</sup>Chemical Insights Research Institute, UL Research Institutes, Marietta, GA 30067

<sup>2</sup>School of Health Sciences, Purdue University, West Lafayette, IN 47907

<sup>3</sup>Present affiliation: Advanced Diagnostic and Therapeutics Technologies Institute, Health Sector, King Abdulaziz City for Science and Technology (KACST), Riyadh 12354, Saudi Arabia

\* Corresponding author: [Christa.Wright@ul.org](mailto:Christa.Wright@ul.org). Center for Toxicology and Human Health, Chemical Insights Research Institute, UL Research Institutes. 2211 Newmarket Parkway, Suite 106, Marietta, GA 30067.

† These authors contributed equally to this work.

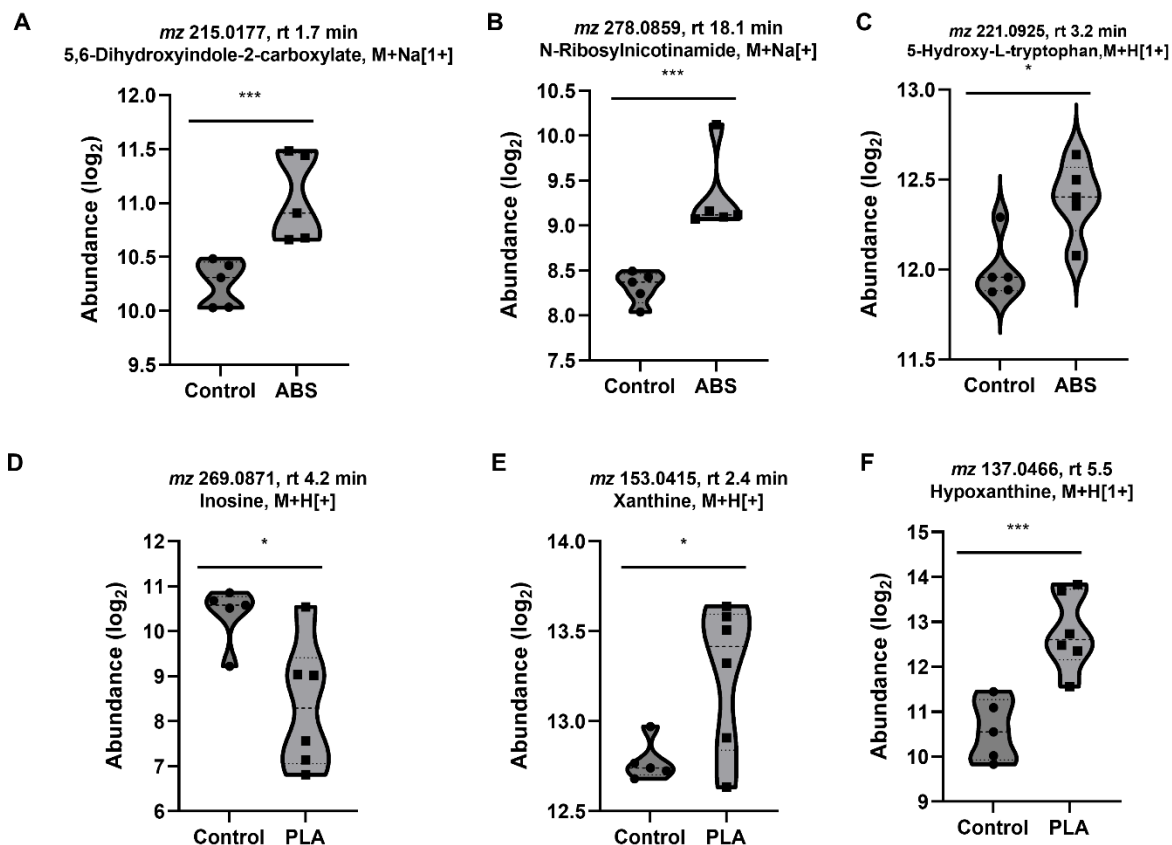

**Figure S1.** Change of metabolites in SAECs induced by ABS emission (A-C) and PLA emission (D-F). (A) 5,6-Dihydroxyindole-2-carboxylate. (B) N-Ribosylnicotinamide. (C) 5-Hydroxy-L-tryptophan. (D) Inosine. (E) Xanthine. (F) Hypoxanthine.  $n = 5-6$ . \*  $p < 0.05$ , \*\*  $p < 0.01$ , \*\*\*  $p < 0.001$ .
